# Supplementary material for: Hydrous Hydrazine Decomposition for Hydrogen Production Using of Ir/CeO2: Effect of Reaction Parameters on the Activity
Source: MDPI journal article supplement (doi:10.3390/nano11051340), 2021-05-19
Supplement: s1 [file s1]

## Supporting Materials

### Hydrous hydrazine decomposition for hydrogen production using of Ir/CeO<sub>2</sub>: effect of reaction parameters on the activity

Davide Motta <sup>1</sup>, Ilaria Barlocco <sup>2</sup>, Silvio Bellomi <sup>2</sup>, Alberto Villa <sup>2,\*</sup> and Nikolaos Dimitratos <sup>3,\*</sup>

- <sup>1</sup> Cardiff Catalysis Institute, School of Chemistry, Cardiff University, Main Building, Park Place, Cardiff CF10 3AT, United Kingdom; [davide.motta90@gmail.com](mailto:davide.motta90@gmail.com)
- <sup>2</sup> Dipartimento di Chimica, Università degli Studi di Milano, via Golgi 19, I-20133 Milano, Italy; [ilaria.barlocco@unimi.it](mailto:ilaria.barlocco@unimi.it) (I.B.), [silvio.bellomi@studenti.unimi.it](mailto:silvio.bellomi@studenti.unimi.it) (S.B.)
- <sup>3</sup> Dipartimento di Chimica Industriale e dei Materiali, ALMA MATER STUDIORUM Università di Bologna, Viale Risorgimento 4, 40136 Bologna, Italy
- \* Correspondence: [nikolaos.dimitratos@unibo.it](mailto:nikolaos.dimitratos@unibo.it) (N.D.); [alberto.villa@unimi.it](mailto:alberto.villa@unimi.it) (A.V.)

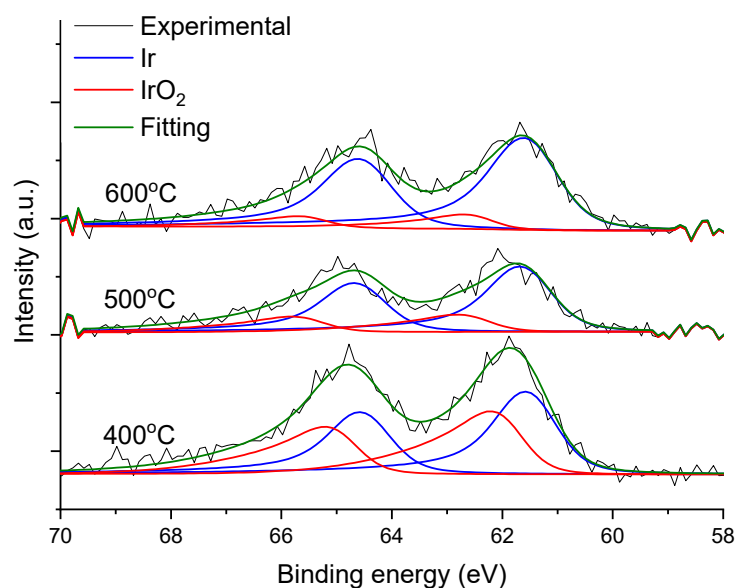

**Figure S1.** XPS experimental spectra and fitting of Ir 4f for Ir/CeO<sub>2</sub> fresh at different reduction temperatures with the deconvolution of the peaks.

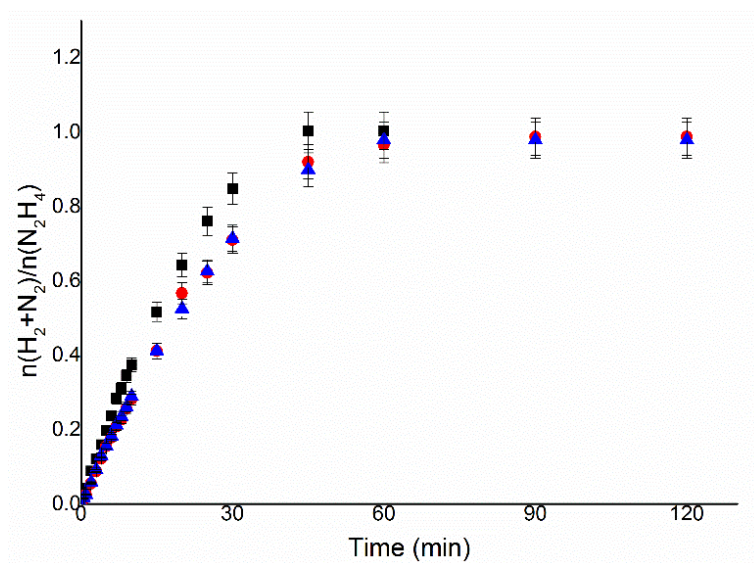

**Figure S2.**  $n(\text{H}_2 + \text{N}_2)/n(\text{N}_2\text{H}_4)$  versus time for reaction of 0.3 mL, 3.3 M of hydrazine monohydrate in 8 mL 0.5 M of NaOH solution using 152.4 mg of Ir/CeO<sub>2</sub> at 50°C and 1050 rpm of stirring rate.

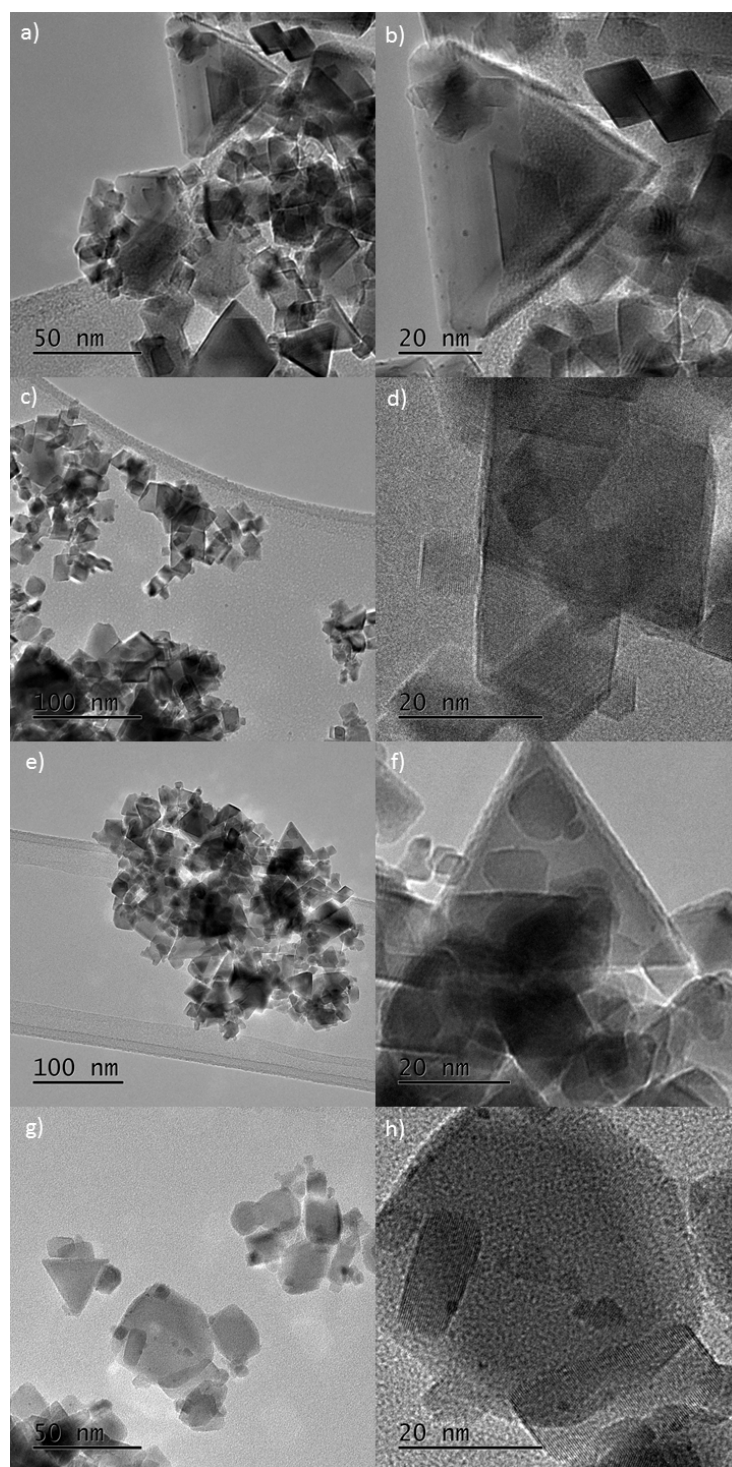

**Figure S3.** TEM images of Ir/CeO<sub>2</sub> fresh, a-d, and used, e-h. Ir nanoparticles can be seen as dark spots in the higher magnification images, while grey larger particles are the CeO<sub>2</sub> support.
